# Supplementary material for: Pragmatic Trials in Genomic Medicine: The Integrating Pharmacogenetics In Clinical Care (I‐PICC) Study
Source: PubMed Central journal article supplement — Clin Transl Sci. 2019 Dec 18;13(2):381–90. doi: 10.1111/cts.12723 (PMC7070795; doi:10.1111/cts.12723), 2019-12-18

## I-PICC Patient Outreach Phone Script

*Study staff calls potentially eligible patients at least 10 days after informed consent letter mailed.*

STUDY STAFF: "Hello, this is STUDY STAFF NAME from VA Boston. May I please speak to PATIENT NAME?"

STUDY STAFF: "I am calling to see if you are interested in participating in the I-PICC Study here at VA Boston. Did you receive the letter we mailed you on MAILING DATE?"

1. *If patient replies "No":* "Could you confirm your mailing address? *Patient gives address.*  
"Okay, thank you. We will send you another copy of the letter describing the I-PICC Study. After you receive and read the letter, please call us back at PHONE NUMBER if you are interested in participating in the study or have any questions. Thank you, and have a nice day."

2. *If patient replies "Yes":* "Great. As you read in the letter, this research study is examining whether a specific genetic test can help identify patients who might have an adverse reaction to statin medications like simvastatin, which are commonly used to lower patients' cholesterol and lower their risk of cardiovascular disease. This test does not test for any genetic diseases. We're asking your permission for your primary care provider to be able to order this test for you if he or she thinks it's appropriate. If he or she does order the test, you will be randomly assigned to have your results sent to your provider immediately or after one year. As with other lab results, your provider will share your results with you and may use the results to make decisions about your healthcare and medications. Do you have any questions so far about the letter we sent you or about the study?"

*Potential patient participant asks question(s), and study staff member responds.*

STUDY STAFF: "This study poses minimal risk to you. If you are enrolled in the study, the research team will look at your VA medical records after one year. We will protect the privacy of your personal data. Your provider will continue to monitor your health and make decisions about your healthcare. Your participation in this study is voluntary and will not impact the care you receive at the VA or your other VA benefits. If you are enrolled in the study, you may withdraw at any time by calling the study staff. Do you have any additional questions about the study?"

*Potential patient participant asks question(s), and study staff member responds.*

STUDY STAFF: "Do we have your permission to contact your provider about possibly ordering this test for you? It will still up to him/her to decide whether to order the test."

1. *If patient replies "No":* "Okay, we will take your name off our list of eligible patients. If you change your mind and would like to enroll in the future, you may call us back at PHONE NUMBER. Thank you, and have a nice day."

2. *If patient replies "Yes":* "Okay, we will add your name to our list of potentially eligible patients. This does not necessarily mean you are enrolled in the I-PICC Study. You will only be enrolled if your provider chooses to order this test for you as a part of your bloodwork. Please do not hesitate to call us back at PHONE NUMBER if you have any further questions about the study or your participation. Thank you for calling, and have a nice day."

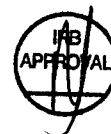

Supplement: CTS-13-381-s002.pdf [file CTS-13-381-s002.pdf]
